# Supplementary material
Source: PubMed Central journal article supplement (PMC10697472)
Supplement: NIHMS1832916-supplement-1.pdf [file NIHMS1832916-supplement-1.pdf]

**Supplementary Table 3.** Results of univariable and multivariable regression models evaluating the associations between Rasch-adjusted scores for the National Eye Institute Visual Function Questionnaire (NEI VFQ-25) and diagnostic classifications based on the proposed objective criteria for glaucomatous optic neuropathy using only patients with binocular vision included in the study.

| Characteristic                                      | Univariable Model    |                  | Multivariable Model  |                  |
|-----------------------------------------------------|----------------------|------------------|----------------------|------------------|
|                                                     | Coefficient (95% CI) | <i>P</i> Value   | Coefficient (95% CI) | <i>P</i> Value   |
| <b>0. normal</b>                                    | 0                    | Base             | 0                    | Base             |
| <b>1. suspect</b>                                   | -3.8 (-5.6 to -2.0)  | <b>&lt;0.001</b> | -1.6 (-4.1 to 0.8)   | 0.198            |
| <b>2. glaucoma</b>                                  | -9.9 (-11.8 to -8.0) | <b>&lt;0.001</b> | -6.6 (-9.3 to -3.8)  | <b>&lt;0.001</b> |
| <b>Age, per decade older</b>                        | -3.0 (-3.6 to -2.4)  | <b>&lt;0.001</b> | -0.2 (-0.3 to -0.2)  | <b>&lt;0.001</b> |
| <b>Sex, female</b>                                  | -4.1 (-6.1 to -2.1)  | <b>&lt;0.001</b> | -4.2 (-6.1 to -2.3)  | <b>&lt;0.001</b> |
| <b>Race, Black or African-American</b>              | -3.9 (-6.0 to -1.8)  | <b>&lt;0.001</b> | -3.5 (-5.6 to -1.4)  | <b>0.001</b>     |
| <b>Marital Status, married</b>                      | 2.4 (0.3 to 4.4)     | <b>0.025</b>     | 1.7 (-0.4 to 3.7)    | 0.113            |
| <b>Insurance, yes</b>                               | -3.0 (-6.6 to 0.5)   | 0.097            |                      |                  |
| <b>Education level, at least high school degree</b> | 4.3 (-1.4 to 10.1)   | 0.138            |                      |                  |
| <b>Income, ≥\$25,000</b>                            | 2.1 (-0.8 to 5.0)    | 0.151            |                      |                  |

Boldface indicates significant ( $P < 0.05$ )
