# Supplementary material
Source: PubMed Central journal article supplement (PMC10697472)
Supplement: NIHMS1832916-supplement-2.pdf [file NIHMS1832916-supplement-2.pdf]

**Supplementary Table 4.** Results of univariable and multivariable regression models evaluating the associations between rasch-adjusted scores for the National Eye Institute Visual Function Questionnaire (NEI VFQ-25) and diagnostic classifications of patients based on the better eye with the proposed objective criteria for glaucomatous optic neuropathy.

| Characteristic                                      | Univariable Model     |                  | Multivariable Model  |                  |
|-----------------------------------------------------|-----------------------|------------------|----------------------|------------------|
|                                                     | Coefficient (95% CI)  | <i>P</i> Value   | Coefficient (95% CI) | <i>P</i> Value   |
| <b>normal</b>                                       | 0                     | Base             | 0                    | Base             |
| <b>suspect</b>                                      | -4.8 (-6.3 to -3.4)   | <b>&lt;0.001</b> | -2.9 (-4.9 to -0.9)  | <b>0.004</b>     |
| <b>glaucoma</b>                                     | -11.7 (-13.7 to -9.7) | <b>&lt;0.001</b> | -9.2 (-12.0 to -6.3) | <b>&lt;0.001</b> |
| <b>Age, per decade older</b>                        | -3.0 (-3.6 to -2.4)   | <b>&lt;0.001</b> | -2.4 (-3.0 to -1.7)  | <b>&lt;0.001</b> |
| <b>Sex, female</b>                                  | -3.5 (-5.4 to -1.5)   | <b>&lt;0.001</b> | -3.8 (-5.6 to -2.0)  | <b>&lt;0.001</b> |
| <b>Race, African-American</b>                       | -3.4 (-5.4 to -1.4)   | <b>0.001</b>     | -3.3 (-5.3 to -1.2)  | <b>0.002</b>     |
| <b>Marital Status, married</b>                      | 2.5 (0.5 to 4.4)      | <b>0.014</b>     | 1.0 (-1.0 to 3.0)    | 0.342            |
| <b>Insurance, yes</b>                               | -3.8 (-7.2 to -0.4)   | <b>0.030</b>     | -1.3 (-4.9 to 2.3)   | 0.478            |
| <b>Education level, at least high school degree</b> | 3.7 (-1.5 to 9.0)     | 0.164            |                      |                  |
| <b>Income, &gt;=\$25,000</b>                        | 3.0 (0.3 to 5.7)      | <b>0.031</b>     | 2.3 (-0.5 to 5.2)    | 0.101            |

Boldface indicates significant ( $P < 0.05$ )
